# Supplementary material for: A computational study of the influence of nanoparticle shape on clathrin-mediated endocytosis
Source: Royal Society of Chemistry journal article supplement (doi:10.1039/d3tb00322a), 2023-01-01
Supplement: d3tb00322a1.pdf [file d3tb00322a1.pdf]

**Supplementary information**

**A computational study of the influence of nanoparticle shape on clathrin-mediated endocytosis**

Ye Li,<sup>a,b,c,\*</sup> Man Zhang,<sup>a,b,c</sup> Yezhuo Zhang,<sup>a,b,c</sup> Xinhui Niu,<sup>a,b,c</sup> Zhendan Liu,<sup>a,b,c</sup>

Tongtao Yue<sup>d</sup> and Wen Zhang<sup>a,b,c</sup>

<sup>a</sup>State Key Laboratory of Tree Genetics and Breeding, College of Biological Sciences and Technology, Beijing Forestry University, Beijing 100083, China

<sup>b</sup>Key Laboratory of Genetics and Breeding in Forest Trees and Ornamental Plants, Ministry of Education, College of Biological Sciences and Technology, Beijing Forestry University, Beijing 100083, China

<sup>c</sup>The Tree and Ornamental Plant Breeding and Biotechnology Laboratory of National Forestry and Grassland Administration, College of Biological Sciences and Technology, Beijing Forestry University, Beijing 10083, China

<sup>d</sup>Institute of Coastal Environmental Pollution Control, Key Laboratory of Marine Environment and Ecology, Ministry of Education, Ocean University of China, Qingdao 266100, China

\*Corresponding author: Ye Li ([liye0223@bjfu.edu.cn](mailto:liye0223@bjfu.edu.cn));

**Table S1** The interaction parameters ( $a_{ij}$ ) between different species beads. The subscript of  $a_{ij}$  denotes different types of beads in the system, with H lipid head, T lipid tail,  $R_H$  receptor head,  $R_T$  receptor tail,  $C_L$  the shorter light chain bead of clathrin,  $C_H$  the longer heavy chain bead of clathrin, P the bead of nanoparticle, H the ligand of nanoparticle and W the water.

| i<br>j | H  | T  | $R_H$ | $R_T$ | P  | H  | $C_L$ | $C_H$ | W  |
|--------|----|----|-------|-------|----|----|-------|-------|----|
| H      | 25 | 50 | 25    | 50    | 25 | 25 | 15    | 15    | 25 |
| T      |    | 15 | 50    | 15    | 50 | 80 | 50    | 50    | 80 |
| $R_H$  |    |    | 25    | 50    | 25 | 0  | 15    | 15    | 25 |
| $R_T$  |    |    |       | 15    | 50 | 80 | 50    | 50    | 80 |
| P      |    |    |       |       | 25 | 25 | 25    | 25    | 25 |
| H      |    |    |       |       |    | 25 | 25    | 25    | 25 |
| $C_L$  |    |    |       |       |    |    | 15    | 10    | 25 |
| $C_H$  |    |    |       |       |    |    |       | 35    | 25 |
| W      |    |    |       |       |    |    |       |       | 25 |

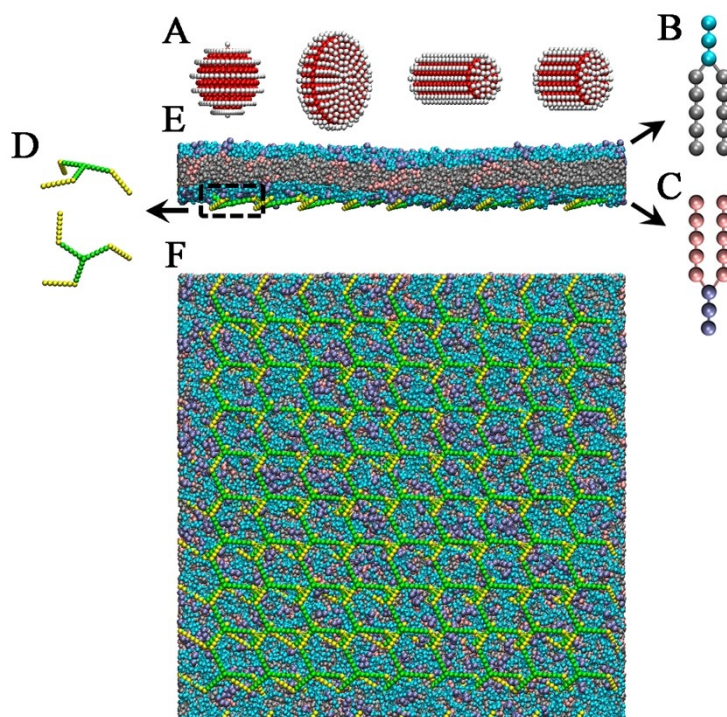

**Fig. S1** Schematic diagram of different components (A, B, C, D) and the initial configuration (E, F) in our simulation system. (A) Nanoparticle, (B) Lipid, (C) Ligand, (D) Clathrin.

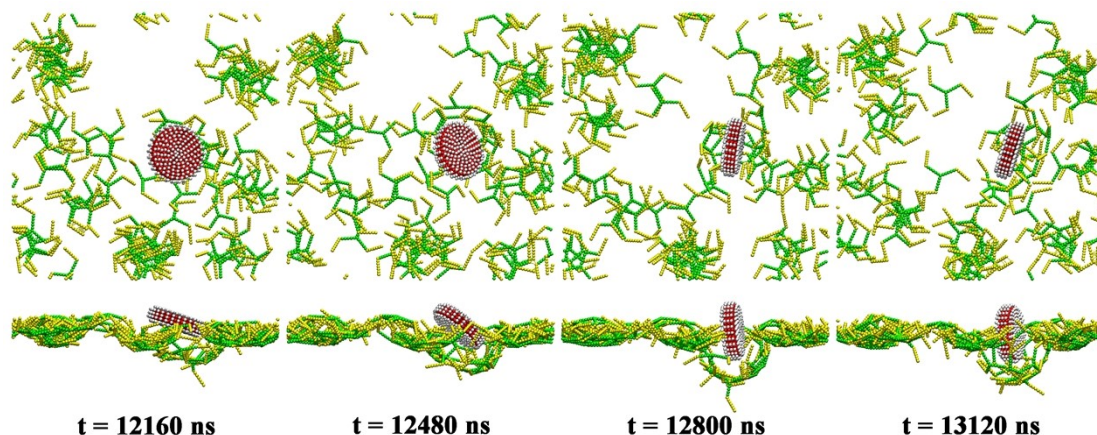

**Fig. S2** The rotation for disk-shaped nanoparticle during the wrapping stage. Several typical snapshots for clathrin-mediated endocytosis of disk-shaped NP ( $\theta_0=90^\circ$ ). The lipid membrane and solvent molecules were not shown for clarity.

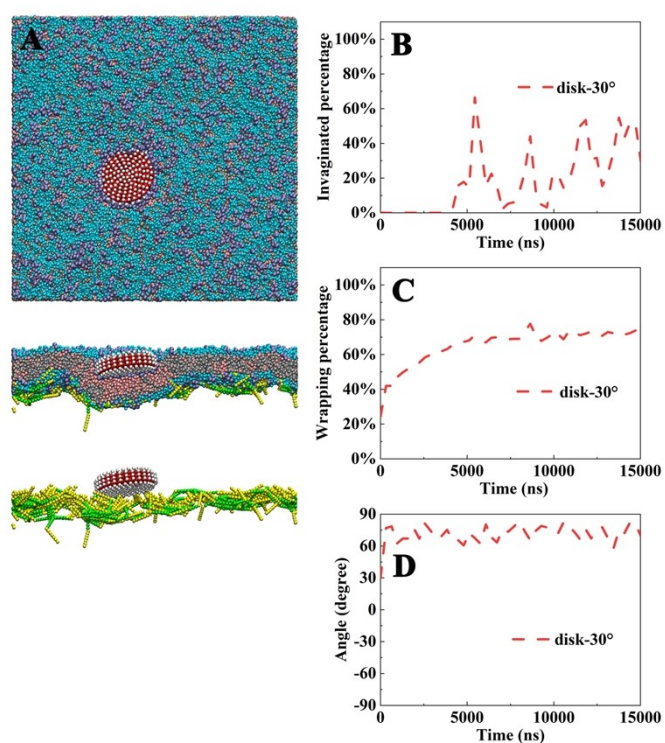

**Fig. S3** Clathrin-mediated endocytosis for disk-shaped NP with initial angle of  $30^\circ$  ( $D=9.7$  nm and  $H=1.9$  nm). (A) Final snapshots of membrane wrapping of disk-shaped NPs from top, cross-sectional views, and only clathrin and NP. (B) Percentage of invagination as a function of time. (C) Percentage of wrapping as a function of time. (D) Evolution of disk-shaped NP orientation angle.

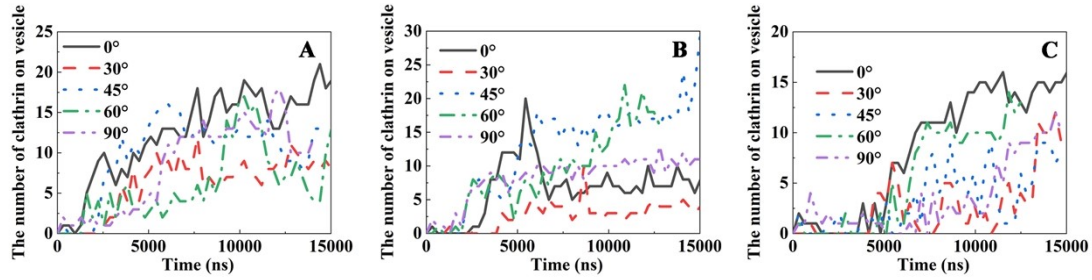

**Fig. S4** The number of clathrin on endocytosis vesicle as a function of time during NP wrapping. (A) Long rod-shaped NPs with the different initial orientation angles. (B) Short rod-shaped NPs with the different initial orientation angles. (C) Disk-shaped NPs with the different initial orientation angles.

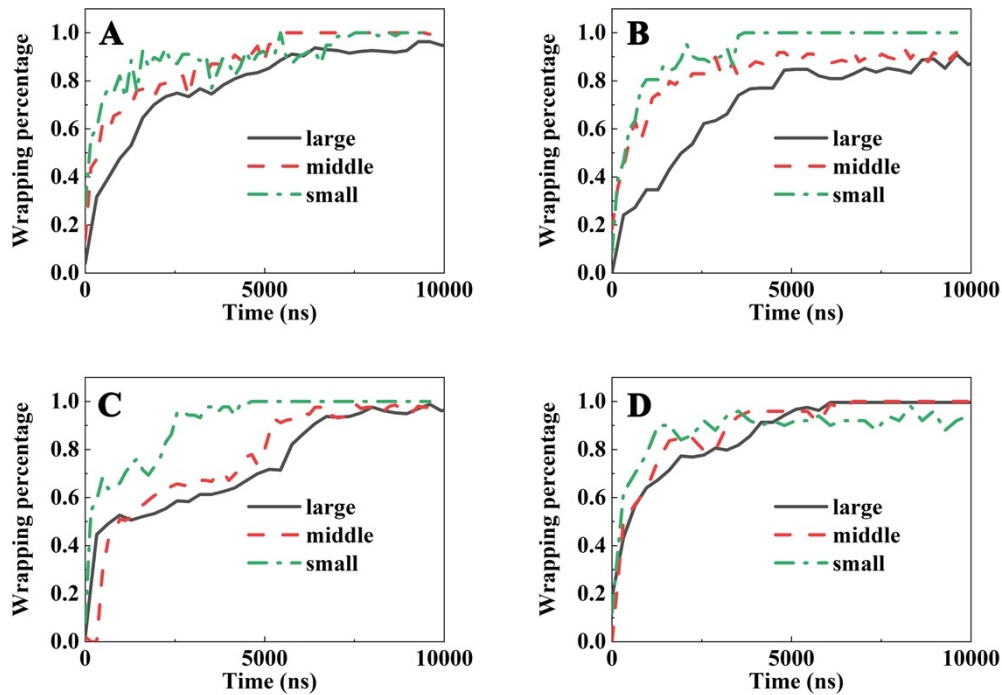

**Fig. S5** Clathrin-mediated endocytosis for NPs with different sizes. (A) Percentage of wrapping as a function of time for long rod-shaped NPs with different sizes. Large NP ( $D=4.5$  nm,  $L=9.7$  nm), middle NP ( $D=3.2$  nm,  $L=8.4$  nm), small NP ( $D=1.9$  nm,  $L=7.1$  nm). (B) Percentage of wrapping as a function of time for short rod-shaped NPs with different sizes. Large NP ( $D=5.8$  nm,  $L=5.8$  nm), middle NP ( $D=4.5$  nm,  $L=4.5$  nm), small NP ( $D=3.2$  nm,  $L=3.2$  nm). (C) Percentage of wrapping as a function of time for disk-shaped NPs with different sizes. Large NP ( $D=9.7$  nm,  $L=1.9$  nm), middle NP ( $D=7.1$  nm,  $L=1.9$  nm), small NP ( $D=4.5$  nm,  $L=1.3$  nm). (D) Percentage of wrapping as a function of time for sphere NPs with different sizes. Large NP ( $D=7.1$  nm), middle NP ( $D=4.5$  nm), small NP ( $D=3.2$  nm).
